# Supplementary material
Source: MDPI journal article supplement (https://www.mdpi.com/2227-7099/11/7/199)

***SUPPLEMENTARY MATERIAL***

***List of tables***

**Table S1.** Bilateral TiVA flows (BRL millions)

**Table S2.** Decomposition of VA (selected indicators)

**Table S3.** Distribution of VA to GVC

**Table S4.** Distribution of interregional TiVA by macrozones' destinations

**Table S5.** Large industry level interregional TiVA

**Table S6.** Revealed Comparative Advantage (RCA) for specialized industries to foreign markets

**Table S7.** Clustering results (K-means method)

**Table S8.** Variables considered in cluster analysis

**Table S9.** Regional setting of IRIO model

**Table S10.** Industrial classification of IRIO model

***List of figures***

**Figure S1.** Interregional industry-level hierarchical TiVA (agriculture, all regions)

**Figure S2.** Interregional industry-level hierarchical TiVA (agriculture, excluding Sao Paulo)

**Figure S3.** Interregional industry-level hierarchical TiVA (mining, all regions)

**Figure S4.** Interregional industry-level hierarchical TiVA (mining, excluding Sao Paulo)

**Figure S5.** Interregional industry-level hierarchical TiVA (manufacturing, all regions).

**Figure S6.** Interregional industry-level hierarchical TiVA (manufacturing, excluding Sao Paulo)

**Figure S7.** Interregional industry-level hierarchical TiVA (tertiary, all regions)

**Figure S8.** Interregional industry-level hierarchical TiVA (tertiary, excluding Sao Paulo)

**Figure S9.** Connectivity trade levels by Brazilian region

## Bilateral TiVA

**Table S1.** Bilateral TiVA flows (BRL millions)

| State            | RO   | AC   | AM     | RR   | PA     | AP   | TO   | MA     | PI   | CE     | RN   | PB   | PE     | AL   | SE   | BA     | MG     | ES     | RJ    | SP      | PR     | SC     | RS     | MS     | MT    | GO     | DF     | RoW<br>(exports) |
|------------------|------|------|--------|------|--------|------|------|--------|------|--------|------|------|--------|------|------|--------|--------|--------|-------|---------|--------|--------|--------|--------|-------|--------|--------|------------------|
| RO               | 0    | 199  | 391    | 41   | 188    | 24   | 27   | 78     | 37   | 118    | 55   | 57   | 157    | 33   | 31   | 216    | 745    | 128    | 465   | 2520    | 667    | 425    | 694    | 185    | 663   | 298    | 258    | 1954             |
| AC               | 198  | 0    | 176    | 12   | 58     | 17   | 11   | 46     | 13   | 58     | 30   | 25   | 82     | 29   | 14   | 93     | 177    | 38     | 153   | 587     | 149    | 86     | 165    | 45     | 100   | 88     | 72     | 81               |
| AM               | 764  | 234  | 0      | 406  | 2022   | 206  | 196  | 742    | 312  | 935    | 419  | 385  | 1282   | 225  | 211  | 1713   | 1972   | 626    | 2175  | 8035    | 1243   | 1016   | 1522   | 371    | 971   | 1010   | 942    | 1856             |
| RR               | 33   | 7    | 283    | 0    | 40     | 5    | 5    | 30     | 4    | 15     | 18   | 17   | 46     | 10   | 6    | 36     | 77     | 23     | 110   | 296     | 67     | 45     | 99     | 19     | 30    | 34     | 32     | 30               |
| PA               | 276  | 66   | 489    | 55   | 0      | 256  | 540  | 595    | 497  | 963    | 331  | 325  | 1102   | 193  | 163  | 774    | 1964   | 498    | 1435  | 6412    | 1308   | 816    | 1451   | 320    | 665   | 1101   | 962    | 17,392           |
| AP               | 13   | 8    | 35     | 4    | 80     | 0    | 15   | 52     | 23   | 47     | 36   | 28   | 59     | 13   | 12   | 78     | 107    | 32     | 152   | 379     | 80     | 48     | 100    | 18     | 23    | 35     | 87     | 128              |
| TO               | 52   | 12   | 179    | 11   | 610    | 40   | 0    | 543    | 126  | 218    | 91   | 93   | 253    | 58   | 58   | 707    | 561    | 125    | 497   | 1469    | 318    | 220    | 350    | 84     | 155   | 381    | 579    | 1583             |
| MA               | 114  | 28   | 268    | 25   | 1974   | 107  | 476  | 0      | 994  | 1100   | 529  | 413  | 996    | 197  | 181  | 1052   | 1121   | 336    | 1580  | 3829    | 812    | 604    | 1015   | 179    | 300   | 502    | 647    | 3101             |
| PI               | 59   | 14   | 121    | 16   | 486    | 63   | 103  | 1038   | 0    | 846    | 402  | 235  | 648    | 147  | 116  | 841    | 353    | 171    | 411   | 1205    | 217    | 200    | 239    | 52     | 118   | 195    | 322    | 981              |
| CE               | 189  | 63   | 501    | 58   | 1327   | 162  | 255  | 2071   | 1359 | 0      | 1304 | 1420 | 3793   | 228  | 175  | 2375   | 1416   | 345    | 710   | 3807    | 773    | 297    | 785    | 208    | 306   | 612    | 1054   | 2783             |
| RN               | 58   | 22   | 259    | 29   | 315    | 65   | 26   | 487    | 194  | 2018   | 0    | 1976 | 1996   | 138  | 139  | 1247   | 238    | 213    | 860   | 1390    | 117    | 146    | 380    | 21     | 44    | 65     | 474    | 719              |
| PB               | 97   | 25   | 146    | 16   | 326    | 61   | 66   | 526    | 170  | 863    | 1489 | 0    | 3049   | 565  | 190  | 1024   | 500    | 223    | 554   | 1498    | 234    | 209    | 328    | 64     | 119   | 195    | 455    | 314              |
| PE               | 291  | 81   | 560    | 75   | 1274   | 146  | 263  | 1923   | 1246 | 2697   | 2931 | 5583 | 0      | 2184 | 820  | 5841   | 1876   | 508    | 1417  | 5523    | 664    | 316    | 1002   | 229    | 463   | 851    | 1375   | 1756             |
| AL               | 74   | 40   | 238    | 16   | 343    | 48   | 78   | 377    | 184  | 486    | 537  | 869  | 2959   | 0    | 509  | 2327   | 903    | 145    | 564   | 1728    | 223    | 118    | 398    | 113    | 158   | 390    | 471    | 1076             |
| SE               | 77   | 22   | 172    | 21   | 356    | 47   | 57   | 318    | 146  | 430    | 257  | 304  | 986    | 494  | 0    | 1941   | 511    | 226    | 722   | 1371    | 201    | 171    | 356    | 56     | 110   | 189    | 354    | 269              |
| BA               | 155  | 62   | 659    | 80   | 1063   | 149  | 326  | 979    | 1017 | 2316   | 911  | 829  | 3530   | 1086 | 2079 | 0      | 6138   | 3262   | 5591  | 14,727  | 1915   | 1353   | 3533   | 737    | 1484  | 2939   | 5346   | 11214            |
| MG               | 1143 | 359  | 2256   | 267  | 3524   | 433  | 889  | 2534   | 994  | 2907   | 1242 | 1259 | 3422   | 1059 | 1068 | 6443   | 0      | 3677   | 11011 | 46,004  | 6557   | 5248   | 5578   | 2053   | 3258  | 11711  | 6678   | 44,337           |
| ES               | 145  | 44   | 451    | 43   | 1115   | 74   | 146  | 809    | 379  | 512    | 253  | 329  | 683    | 220  | 228  | 4468   | 3747   | 0      | 10772 | 5971    | 916    | 712    | 1024   | 258    | 387   | 836    | 945    | 12,887           |
| RJ               | 751  | 172  | 1908   | 211  | 1706   | 340  | 752  | 1634   | 992  | 1926   | 1149 | 1449 | 2506   | 915  | 833  | 11,310 | 22830  | 6324   | 0     | 77,768  | 10082  | 6858   | 10580  | 2170   | 3760  | 5707   | 10007  | 52,549           |
| SP               | 6870 | 1952 | 12,370 | 1854 | 18,133 | 2518 | 6097 | 12,922 | 6088 | 15,251 | 6862 | 7918 | 18,519 | 5744 | 4440 | 41,056 | 99,113 | 15,891 | 94203 | 0       | 83682  | 35648  | 52838  | 21,972 | 21321 | 19,995 | 12,700 | 165,216          |
| PR               | 938  | 246  | 1494   | 194  | 1744   | 267  | 438  | 1134   | 539  | 1518   | 665  | 748  | 1777   | 549  | 485  | 3970   | 7889   | 2180   | 9426  | 64,417  | 0      | 10349  | 7172   | 2231   | 1944  | 3480   | 4434   | 30,801           |
| SC               | 311  | 73   | 759    | 95   | 877    | 138  | 365  | 1452   | 542  | 568    | 243  | 548  | 791    | 236  | 266  | 2601   | 4907   | 781    | 3491  | 28,107  | 9964   | 0      | 10839  | 1002   | 1331  | 2293   | 2427   | 18,851           |
| RS               | 1013 | 237  | 1961   | 274  | 2742   | 444  | 776  | 2961   | 1106 | 2116   | 1002 | 1298 | 2483   | 692  | 598  | 5135   | 7453   | 2154   | 7376  | 34,002  | 8254   | 8258   | 0      | 1901   | 2818  | 3994   | 4192   | 36,198           |
| MS               | 339  | 86   | 534    | 58   | 608    | 102  | 129  | 401    | 165  | 391    | 179  | 187  | 501    | 153  | 116  | 977    | 1768   | 535    | 1947  | 11,967  | 2053   | 1308   | 1946   | 0      | 866   | 1316   | 1169   | 6747             |
| MT               | 1012 | 202  | 1814   | 124  | 1414   | 147  | 266  | 765    | 301  | 811    | 357  | 390  | 1055   | 249  | 223  | 2328   | 3196   | 645    | 2466  | 7991    | 1582   | 1209   | 2211   | 707    | 0     | 2121   | 2094   | 16,989           |
| GO               | 497  | 148  | 918    | 146  | 1763   | 204  | 606  | 1235   | 492  | 994    | 437  | 435  | 1263   | 376  | 322  | 1658   | 7030   | 1170   | 3821  | 17,072  | 1389   | 1703   | 2486   | 709    | 1647  | 0      | 8667   | 8345             |
| DF               | 853  | 185  | 1108   | 112  | 2694   | 366  | 893  | 2152   | 816  | 2352   | 1402 | 1377 | 3158   | 858  | 818  | 3751   | 8647   | 2071   | 9264  | 20,851  | 3194   | 3699   | 4185   | 873    | 2048  | 9009   | 0      | 546              |
| RoW<br>(imports) | 1503 | 395  | 10,479 | 258  | 6082   | 304  | 1224 | 3484   | 1343 | 5437   | 2641 | 1865 | 7745   | 1976 | 1988 | 16,264 | 34742  | 10019  | 50759 | 146,358 | 27,314 | 16,788 | 26,350 | 5085   | 7803  | 10,448 | 8246   | 0                |

Note: Brazilian regions in table: **(1) Macrozone North:** RO Rondonia, AC Acre, AM Amazonas, RR, Roraima, PA, Pará, AP Amapá, TO, Tocantins; **(2) Macrozone Northeast:** MA Maranhão, PI Piauí, CE Ceará, RN Rio Grande do Norte, PB Paraíba, PE Pernambuco, AL Alagoas, SE Sergipe, BA Bahia; **(3) Macrozone Southeast:** MG Minas Gerais, ES Espírito Santo, RJ Rio de Janeiro, SP São Paulo; **(4) Macrozone South:** PR Paraná, SC Santa Catarina, RS Rio Grande do Sul; **(5) Macrozone Midwest:** MS Mato Grosso do Sul, MT Mato Grosso, GO Goiás, DF Distrito Federal.

## Decomposition of TiVA

**Table S2.** Decomposition of VA (selected indicators)

| Macrozone | State | DVA       | VA/GO | E/GO  | E/VA  | Inter-regional TiVA (BRL millions) |           |           |         |         | GVC <sup>1</sup> |
|-----------|-------|-----------|-------|-------|-------|------------------------------------|-----------|-----------|---------|---------|------------------|
|           |       |           |       |       |       | North                              | Northeast | Southeast | South   | Midwest |                  |
| North     | RO    | 32,309    | 28.6% | 6.3%  | 11.2% | 870                                | 782       | 3,857     | 1786    | 1404    | 1954             |
|           | AC    | 12,304    | 30.9% | 0.6%  | 0.8%  | 471                                | 389       | 956       | 401     | 304     | 81               |
|           | AM    | 72,281    | 29.2% | 2.1%  | 4.9%  | 3,828                              | 6223      | 12,807    | 3780    | 3294    | 1856             |
|           | RR    | 9363      | 32.0% | 0.3%  | 0.4%  | 373                                | 182       | 506       | 210     | 115     | 30               |
|           | PA    | 117,550   | 31.2% | 14.0% | 24.3% | 1,681                              | 4943      | 10,309    | 3576    | 3048    | 17,392           |
|           | AP    | 12,680    | 32.7% | 1.3%  | 1.8%  | 155                                | 348       | 669       | 228     | 162     | 128              |
|           | TO    | 26,046    | 26.5% | 6.6%  | 11.6% | 904                                | 2147      | 2653      | 889     | 1198    | 1583             |
| Northeast | MA    | 69,370    | 31.2% | 4.2%  | 7.1%  | 2,993                              | 5463      | 6866      | 2432    | 1627    | 3101             |
|           | PI    | 34,723    | 30.1% | 2.8%  | 4.5%  | 861                                | 4273      | 2140      | 655     | 687     | 981              |
|           | CE    | 114,157   | 29.8% | 2.4%  | 4.1%  | 2555                               | 12,725    | 6278      | 1856    | 2179    | 2,783            |
|           | RN    | 50,889    | 29.8% | 1.5%  | 2.6%  | 773                                | 8193      | 2702      | 643     | 604     | 719              |
|           | PB    | 49,610    | 31.4% | 0.8%  | 1.2%  | 737                                | 7876      | 2774      | 770     | 833     | 314              |
|           | PE    | 134,105   | 27.9% | 1.6%  | 3.1%  | 2,690                              | 23,225    | 9325      | 1982    | 2919    | 1756             |
|           | AL    | 41,993    | 36.3% | 2.8%  | 4.4%  | 838                                | 8247      | 3340      | 739     | 1133    | 1076             |
|           | SE    | 34,415    | 32.3% | 0.8%  | 1.4%  | 752                                | 4876      | 2829      | 727     | 708     | 269              |
|           | BA    | 215,660   | 27.5% | 5.5%  | 11.4% | 2496                               | 12,748    | 29,718    | 6801    | 10,505  | 11,214           |
| Southeast | MG    | 457,284   | 29.7% | 8.8%  | 17.6% | 8869                               | 20,930    | 60,692    | 17,384  | 23,700  | 44,337           |
|           | ES    | 100,343   | 29.7% | 12.0% | 23.7% | 2018                               | 7881      | 20,490    | 2652    | 2426    | 12,887           |
|           | RJ    | 556,164   | 31.4% | 7.6%  | 14.7% | 5840                               | 22,714    | 106,923   | 27,520  | 21,644  | 52,549           |
|           | SP    | 1,633,314 | 28.2% | 8.1%  | 16.5% | 49,793                             | 118,801   | 209,207   | 172,168 | 75,989  | 165,216          |
| South     | PR    | 327,047   | 28.8% | 8.6%  | 18.3% | 5322                               | 11,385    | 83,912    | 17,521  | 12,090  | 30,801           |
|           | SC    | 209,667   | 29.6% | 8.3%  | 16.5% | ,616                               | 7247      | 37,286    | 20,802  | 7052    | 18,851           |
|           | RS    | 334,842   | 28.2% | 9.4%  | 19.7% | 7447                               | 17,392    | 50,985    | 16,512  | 12,904  | 36,198           |
| MidWest   | MS    | 74,086    | 29.1% | 9.1%  | 18.4% | 1856                               | 3070      | 16,218    | 5307    | 3350    | 6747             |
|           | MT    | 97,283    | 26.7% | 16.1% | 37.0% | 4980                               | 6479      | 14,298    | 5002    | 4923    | 16,989           |
|           | GO    | 154,347   | 27.8% | 5.6%  | 11.3% | 4282                               | 7211      | 29,093    | 5578    | 11,023  | 8345             |
|           | DF    | 183,769   | 30.9% | 0.4%  | 0.6%  | 6210                               | 16,685    | 40,833    | 11,078  | 11,930  | 546              |

*Legend: VA – Value-Added, GO – Gross Output, E – Exports.*

*Note: <sup>1</sup> – exports TiVA.*

**Table S3.** Distribution of VA to GVC

| Macrozone | State | GVC<br>(share of DVA) <sup>1</sup> | Distribution of TiVA to GVC <sup>2</sup> |        |               |          |
|-----------|-------|------------------------------------|------------------------------------------|--------|---------------|----------|
|           |       |                                    | Agriculture                              | Mining | Manufacturing | Tertiary |
| North     | RO    | 6%                                 | 53%                                      | 1%     | 21%           | 25%      |
|           | AC    | 1%                                 | 81%                                      | 0%     | 11%           | 8%       |
|           | AM    | 3%                                 | 14%                                      | 1%     | 51%           | 35%      |
|           | RR    | 0%                                 | 77%                                      | 0%     | 17%           | 6%       |
|           | PA    | 15%                                | 14%                                      | 55%    | 10%           | 21%      |
|           | AP    | 1%                                 | 21%                                      | 11%    | 46%           | 22%      |
|           | TO    | 6%                                 | 73%                                      | 0%     | 8%            | 19%      |
| Northeast | MA    | 4%                                 | 61%                                      | 1%     | 20%           | 19%      |
|           | PI    | 3%                                 | 86%                                      | 0%     | 3%            | 10%      |
|           | CE    | 2%                                 | 28%                                      | 1%     | 40%           | 30%      |
|           | RN    | 1%                                 | 48%                                      | 8%     | 21%           | 23%      |
|           | PB    | 1%                                 | 10%                                      | 4%     | 66%           | 20%      |
|           | PE    | 1%                                 | 16%                                      | 0%     | 47%           | 37%      |
|           | AL    | 3%                                 | 23%                                      | 0%     | 57%           | 20%      |
|           | SE    | 1%                                 | 14%                                      | 0%     | 60%           | 25%      |
| Southeast | BA    | 5%                                 | 34%                                      | 3%     | 33%           | 31%      |
|           | MG    | 10%                                | 17%                                      | 25%    | 26%           | 32%      |
|           | ES    | 13%                                | 13%                                      | 32%    | 21%           | 33%      |
|           | RJ    | 9%                                 | 0%                                       | 26%    | 17%           | 56%      |
| South     | SP    | 10%                                | 4%                                       | 2%     | 29%           | 65%      |
|           | PR    | 9%                                 | 28%                                      | 0%     | 33%           | 39%      |
|           | SC    | 9%                                 | 11%                                      | 0%     | 44%           | 44%      |
|           | RS    | 11%                                | 32%                                      | 0%     | 34%           | 34%      |
| MidWest   | MS    | 9%                                 | 49%                                      | 3%     | 24%           | 25%      |
|           | MT    | 17%                                | 64%                                      | 0%     | 9%            | 27%      |
|           | GO    | 5%                                 | 44%                                      | 5%     | 21%           | 30%      |
|           | DF    | 3%                                 | 30%                                      | 0%     | 26%           | 44%      |

*Note: <sup>1</sup> – It represents how much of the DVA is destined for GVC. <sup>2</sup> – The sum of the four columns is 100%, being the total of TiVA to exports broken down into four large industrial groups.*

**Table S4.** Distribution of interregional TiVA by macrozones' destinations

| Macrozone | State | Extension of DVC <sup>1</sup> |           |           |       |         |
|-----------|-------|-------------------------------|-----------|-----------|-------|---------|
|           |       | North                         | Northeast | Southeast | South | Midwest |
| North     | RO    | 10%                           | 9%        | 44%       | 21%   | 16%     |
|           | AC    | 19%                           | 15%       | 38%       | 16%   | 12%     |
|           | AM    | 13%                           | 21%       | 43%       | 13%   | 11%     |
|           | RR    | 27%                           | 13%       | 36%       | 15%   | 8%      |
|           | PA    | 7%                            | 21%       | 44%       | 15%   | 13%     |
|           | AP    | 10%                           | 22%       | 43%       | 15%   | 10%     |
|           | TO    | 12%                           | 28%       | 34%       | 11%   | 15%     |
| Northeast | MA    | 15%                           | 28%       | 35%       | 13%   | 8%      |
|           | PI    | 10%                           | 50%       | 25%       | 8%    | 8%      |
|           | CE    | 10%                           | 50%       | 25%       | 7%    | 9%      |
|           | RN    | 6%                            | 63%       | 21%       | 5%    | 5%      |
|           | PB    | 6%                            | 61%       | 21%       | 6%    | 6%      |
|           | PE    | 7%                            | 58%       | 23%       | 5%    | 7%      |
|           | AL    | 6%                            | 58%       | 23%       | 5%    | 8%      |
|           | SE    | 8%                            | 49%       | 29%       | 7%    | 7%      |
|           | BA    | 4%                            | 20%       | 48%       | 11%   | 17%     |
| Southeast | MG    | 7%                            | 16%       | 46%       | 13%   | 18%     |
|           | ES    | 6%                            | 22%       | 58%       | 7%    | 7%      |
|           | RJ    | 3%                            | 12%       | 58%       | 15%   | 12%     |
|           | SP    | 8%                            | 19%       | 33%       | 28%   | 12%     |
| South     | PR    | 4%                            | 9%        | 64%       | 13%   | 9%      |
|           | SC    | 3%                            | 10%       | 50%       | 28%   | 9%      |
|           | RS    | 7%                            | 17%       | 48%       | 16%   | 12%     |
| MidWest   | MS    | 6%                            | 10%       | 54%       | 18%   | 11%     |
|           | MT    | 14%                           | 18%       | 40%       | 14%   | 14%     |
|           | GO    | 7%                            | 13%       | 51%       | 10%   | 19%     |
|           | DF    | 7%                            | 19%       | 47%       | 13%   | 14%     |

*Note: <sup>1</sup> – Represents how much each State (rows) sends from VA to the states destined to each macrozone (column). The sum of the columns is 100%, being the total interregional TiVA.*

**Table S5.** Large industry level interregional TiVA

| Macrozone | State (origin) | Agriculture' DVC |     |     |    |    | Mining' DVC |    |     |    |    | Manufacturing' DVC |     |     |    |    | Tertiary' DVC |     |     |     |     |
|-----------|----------------|------------------|-----|-----|----|----|-------------|----|-----|----|----|--------------------|-----|-----|----|----|---------------|-----|-----|-----|-----|
|           |                | NO               | NE  | SE  | SO | MW | NO          | NE | SE  | SO | MW | NO                 | NE  | SE  | SO | MW | NO            | NE  | SE  | SO  | MW  |
| North     | RO             | 2%               | 2%  | 13% | 9% | 8% | 0%          | 0% | 0%  | 0% | 0% | 1%                 | 1%  | 5%  | 2% | 2% | 7%            | 6%  | 26% | 10% | 7%  |
|           | AC             | 4%               | 5%  | 16% | 8% | 6% | 0%          | 0% | 0%  | 0% | 0% | 1%                 | 1%  | 3%  | 1% | 1% | 13%           | 9%  | 19% | 7%  | 5%  |
|           | AM             | 1%               | 2%  | 6%  | 2% | 2% | 1%          | 1% | 2%  | 1% | 0% | 6%                 | 10% | 18% | 5% | 5% | 5%            | 8%  | 17% | 5%  | 4%  |
|           | RR             | 5%               | 4%  | 12% | 5% | 4% | 0%          | 0% | 0%  | 0% | 0% | 1%                 | 0%  | 1%  | 0% | 0% | 21%           | 8%  | 23% | 9%  | 4%  |
|           | PA             | 2%               | 7%  | 18% | 7% | 5% | 0%          | 1% | 3%  | 1% | 0% | 1%                 | 3%  | 6%  | 2% | 2% | 4%            | 10% | 17% | 6%  | 6%  |
|           | AP             | 1%               | 2%  | 4%  | 1% | 1% | 0%          | 0% | 0%  | 0% | 0% | 1%                 | 2%  | 4%  | 1% | 1% | 8%            | 19% | 35% | 12% | 9%  |
|           | TO             | 2%               | 5%  | 10% | 5% | 4% | 0%          | 0% | 0%  | 0% | 0% | 1%                 | 2%  | 3%  | 1% | 1% | 9%            | 20% | 20% | 6%  | 10% |
| Northeast | MA             | 2%               | 5%  | 8%  | 3% | 2% | 0%          | 1% | 1%  | 0% | 0% | 3%                 | 4%  | 6%  | 2% | 1% | 10%           | 18% | 21% | 7%  | 5%  |
|           | PI             | 1%               | 6%  | 6%  | 2% | 2% | 0%          | 0% | 0%  | 0% | 0% | 1%                 | 4%  | 3%  | 1% | 1% | 8%            | 39% | 15% | 5%  | 5%  |
|           | CE             | 1%               | 5%  | 4%  | 1% | 1% | 0%          | 0% | 0%  | 0% | 0% | 2%                 | 10% | 6%  | 1% | 2% | 7%            | 35% | 14% | 4%  | 6%  |
|           | RN             | 0%               | 4%  | 2%  | 1% | 0% | 1%          | 8% | 4%  | 1% | 0% | 1%                 | 10% | 3%  | 1% | 0% | 4%            | 42% | 12% | 3%  | 4%  |
|           | PB             | 0%               | 6%  | 3%  | 1% | 1% | 0%          | 1% | 0%  | 0% | 0% | 1%                 | 11% | 5%  | 1% | 1% | 4%            | 43% | 13% | 3%  | 5%  |
|           | PE             | 0%               | 4%  | 3%  | 1% | 1% | 0%          | 0% | 0%  | 0% | 0% | 2%                 | 13% | 7%  | 1% | 2% | 5%            | 40% | 13% | 3%  | 5%  |
|           | AL             | 1%               | 16% | 7%  | 2% | 2% | 0%          | 1% | 0%  | 0% | 0% | 1%                 | 7%  | 4%  | 1% | 1% | 4%            | 34% | 11% | 3%  | 4%  |
|           | SE             | 0%               | 6%  | 5%  | 1% | 1% | 1%          | 4% | 4%  | 1% | 0% | 1%                 | 8%  | 5%  | 1% | 1% | 5%            | 31% | 15% | 4%  | 5%  |
|           | BA             | 0%               | 3%  | 10% | 2% | 3% | 0%          | 1% | 2%  | 0% | 0% | 1%                 | 5%  | 12% | 2% | 4% | 3%            | 12% | 24% | 6%  | 10% |
| Southeast | MG             | 0%               | 1%  | 5%  | 2% | 2% | 0%          | 0% | 2%  | 1% | 0% | 2%                 | 4%  | 15% | 3% | 4% | 5%            | 11% | 24% | 7%  | 11% |
|           | ES             | 0%               | 1%  | 3%  | 1% | 0% | 1%          | 4% | 17% | 2% | 1% | 1%                 | 3%  | 10% | 1% | 1% | 4%            | 14% | 28% | 4%  | 5%  |
|           | RJ             | 0%               | 0%  | 1%  | 0% | 0% | 0%          | 2% | 12% | 3% | 1% | 0%                 | 1%  | 8%  | 2% | 1% | 2%            | 9%  | 37% | 10% | 9%  |
|           | SP             | 0%               | 0%  | 1%  | 1% | 0% | 0%          | 0% | 0%  | 0% | 0% | 1%                 | 4%  | 9%  | 7% | 3% | 7%            | 15% | 23% | 19% | 9%  |
| South     | PR             | 0%               | 1%  | 11% | 2% | 1% | 0%          | 0% | 0%  | 0% | 0% | 1%                 | 2%  | 19% | 3% | 2% | 3%            | 6%  | 35% | 8%  | 6%  |
|           | SC             | 0%               | 1%  | 6%  | 4% | 1% | 0%          | 0% | 0%  | 0% | 0% | 1%                 | 3%  | 21% | 9% | 3% | 2%            | 6%  | 23% | 14% | 5%  |
|           | RS             | 0%               | 1%  | 8%  | 3% | 2% | 0%          | 0% | 0%  | 0% | 0% | 2%                 | 4%  | 17% | 4% | 3% | 5%            | 11% | 23% | 8%  | 7%  |
| MidWest   | MS             | 1%               | 2%  | 20% | 7% | 3% | 0%          | 0% | 0%  | 0% | 0% | 1%                 | 2%  | 10% | 3% | 2% | 4%            | 6%  | 24% | 8%  | 6%  |
|           | MT             | 1%               | 3%  | 11% | 4% | 3% | 0%          | 0% | 0%  | 0% | 0% | 2%                 | 3%  | 7%  | 2% | 2% | 11%           | 12% | 22% | 7%  | 9%  |
|           | GO             | 1%               | 2%  | 12% | 3% | 3% | 0%          | 0% | 1%  | 0% | 0% | 2%                 | 3%  | 13% | 2% | 4% | 5%            | 8%  | 25% | 5%  | 13% |
|           | DF             | 0%               | 0%  | 0%  | 0% | 0% | 0%          | 0% | 0%  | 0% | 0% | 0%                 | 0%  | 1%  | 0% | 0% | 7%            | 19% | 46% | 13% | 13% |

*Note: Each line is the state of origin, and in the columns is the destination macrozone of TiVA in four large industrial groups. The row' sum is 100%.*

**Table S6.** Revealed Comparative Advantage (RCA) for specialized industries to foreign markets<sup>1</sup>

| Industry                                                                  | Non-Core |           |         |       |     | Core (Southeast) |     |     |
|---------------------------------------------------------------------------|----------|-----------|---------|-------|-----|------------------|-----|-----|
|                                                                           | North    | Northeast | Midwest | South | SP  | RJ               | MG  | ES  |
| A - Agriculture, livestock, forest production, fisheries, and aquaculture | 1.4      | 2.3       | 3.5     | 1.7   |     |                  | 1.1 |     |
| B - Extractive industries                                                 | 4.3      |           |         |       |     | 2.7              | 2.6 | 3.3 |
| C - Manufacturing industries                                              |          | 1.2       |         | 1.3   | 1.1 |                  |     |     |
| D - Electricity and gas                                                   | 1.5      | 1.1       | 2.0     | 1.2   |     |                  | 1.4 |     |
| E - Water, sewage, waste management and decontamination activities        |          |           |         |       |     | 1.1              | 2.0 | 2.2 |
| F - Construction                                                          |          |           |         | 2.1   |     |                  |     | 1.1 |
| G - Trade; repair of motor vehicles and motorcycles                       |          |           | 1.1     | 1.2   | 1.2 |                  |     |     |
| H - Transport, storage, and mail                                          |          |           |         |       | 1.2 | 1.3              |     | 1.3 |
| I - Accommodation and food                                                |          |           |         |       | 1.6 | 1.8              |     |     |
| J - Information and communication                                         |          |           |         |       | 1.8 |                  |     |     |
| K - Financial, insurance and related services                             |          |           |         |       | 1.8 |                  |     |     |
| L - Real estate activities                                                |          |           |         |       | 1.9 |                  |     |     |
| M - Professional, scientific, and technical activities                    |          |           |         |       | 1.3 | 2.0              |     |     |
| N - Administrative activities and complementary services                  |          |           |         |       | 1.6 | 1.5              |     |     |
| O - Public administration, defense, and social security                   |          |           |         |       | 1.2 | 1.3              |     |     |
| P - Education                                                             |          |           |         |       | 1.1 | 2.0              | 1.3 |     |
| Q - Human health and social services                                      |          |           |         |       | 1.6 | 2.5              |     |     |
| R - Arts, culture, sport, and recreation                                  |          |           |         |       | 2.0 | 1.6              |     |     |
| S - Other service activities                                              |          |           |         |       | 1.2 | 1.1              |     | 1.1 |
| T - Domestic services                                                     |          |           |         |       |     |                  |     |     |

*Note: Only RCA > 1.0 significant at 99% of significance are presented (z-critical of 2.575) calculated based on Moineddin et al. (2003).*

*Legend: NO (North), NE (Northeast), MW (Midwest), SO (South), S.P. (Sao Paulo), R.J. (Rio de Janeiro), M.G. (Minas Gerais), and E.S. (Espírito Santo).*

Source: Authors 2021.

**Table S7.** Clustering results (K-means method)

| Brazilian state | Macrozone | Cluster |
|-----------------|-----------|---------|
| AM              | North     | 1       |
| AP              | North     | 1       |
| BA              | Northeast | 1       |
| PR              | South     | 1       |
| SC              | South     | 1       |
| RS              | South     | 1       |
| MS              | Midwest   | 1       |
| GO              | Midwest   | 1       |
| DF              | Midwest   | 1       |
| MG              | Southeast | 2       |
| ES              | Southeast | 2       |
| RJ              | Southeast | 2       |
| SP              | Southeast | 2       |
| PI              | Northeast | 3       |
| CE              | Northeast | 3       |
| RN              | Northeast | 3       |
| PB              | Northeast | 3       |
| PE              | Northeast | 3       |
| AL              | Northeast | 3       |
| SE              | Northeast | 3       |
| RO              | North     | 4       |
| AC              | North     | 4       |
| RR              | North     | 4       |
| PA              | North     | 4       |
| TO              | North     | 4       |
| MA              | Northeast | 4       |
| MT              | Midwest   | 4       |

*Note: The result is based on the Kmeans cluster, further proving a general classification of each Brazilian state in terms of value-added trade pattern considering both DVC – intraregional and interregional – and GVC trade flows.*

**Table S8.** Variables considered in cluster analysis

| Variables             | Description                                                                        |
|-----------------------|------------------------------------------------------------------------------------|
| dva                   | Total domestic value-added for each state                                          |
| gvc_to                | Total value-added to exports for each state                                        |
| intrazone_va          | Total TiVA retained within each Brazilian administrative macrozones, by state      |
| intra_consumption     | Total TiVA consumed within each Brazilian administrative macrozones, by state      |
| intra_macro           | Total TiVA generated within each Brazilian administrative macrozones, by state     |
| interregional_share   | Total interregional TiVA, by state                                                 |
| gvc_share_of_total    | Share of TiVA in exports by the total TiVA traded by each state                    |
| gvc_agriculture       | Relative participation of TiVA in agriculture by the total TiVA for GVC            |
| gvc_mining            | Relative participation of TiVA in mining by the total TiVA for GVC                 |
| gvc_manufacturing     | Relative participation of TiVA in manufacturing by the total TiVA for GVC          |
| gvc_tertiary          | Relative participation of TiVA in tertiary industries by the total TiVA for GVC    |
| agric_to_north        | Total TiVA in agriculture for Northern states, by state of origin                  |
| agric_to_northeast    | Total TiVA in agriculture for Northeastern states, by state of origin              |
| agric_to_southeast    | Total TiVA in agriculture for Southeastern states, by state of origin              |
| agric_to_south        | Total TiVA in agriculture for Southern states, by state of origin                  |
| agric_to_midwest      | Total TiVA in agriculture for Midwestern states, by state of origin                |
| mining_to_north       | Total TiVA in mining industries for Northern states, by state of origin            |
| mining_to_northeast   | Total TiVA in mining industries for Northeastern states, by state of origin        |
| mining_to_southeast   | Total TiVA in mining industries for Southeastern states, by state of origin        |
| mining_to_south       | Total TiVA in mining industries for Southern states, by state of origin            |
| mining_to_midwest     | Total TiVA in mining industries for Midwestern states, by state of origin          |
| manuf_to_north        | Total TiVA in manufacturing industries for Northern states, by state of origin     |
| manuf_to_northeast    | Total TiVA in manufacturing industries for Northeastern states, by state of origin |
| manuf_to_southeast    | Total TiVA in manufacturing industries for Southeastern states, by state of origin |
| manuf_to_south        | Total TiVA in manufacturing industries for Southern states, by state of origin     |
| manuf_to_midwest      | Total TiVA in manufacturing industries for Midwestern states, by state of origin   |
| tertiary_to_north     | Total TiVA in tertiary industries for Northern states, by state of origin          |
| tertiary_to_northeast | Total TiVA in tertiary industries for Northeastern states, by state of origin      |
| tertiary_to_southeast | Total TiVA in tertiary industries for Southeastern states, by state of origin      |
| tertiary_to_south     | Total TiVA in tertiary industries for Southern states, by state of origin          |
| tertiary_to_midwest   | Total TiVA in tertiary industries for Midwestern states, by state of origin        |

## FIGURES

### AGRICULTURE

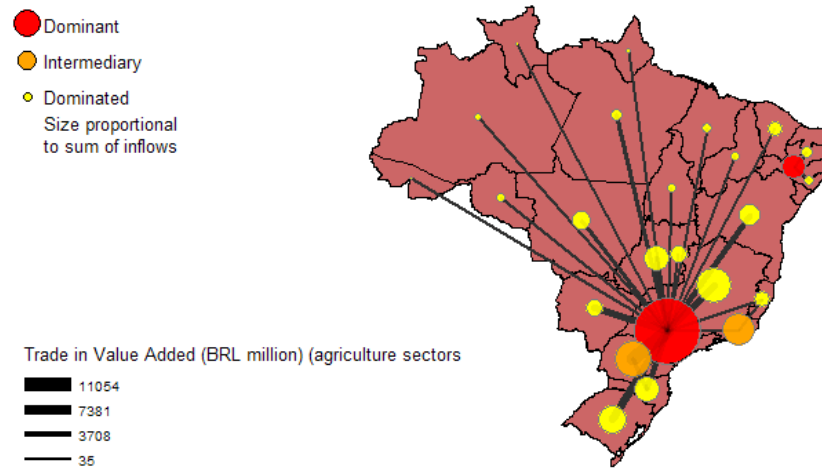

**Figure S1.** Interregional industry-level hierarchical TiVA (agriculture, all regions)

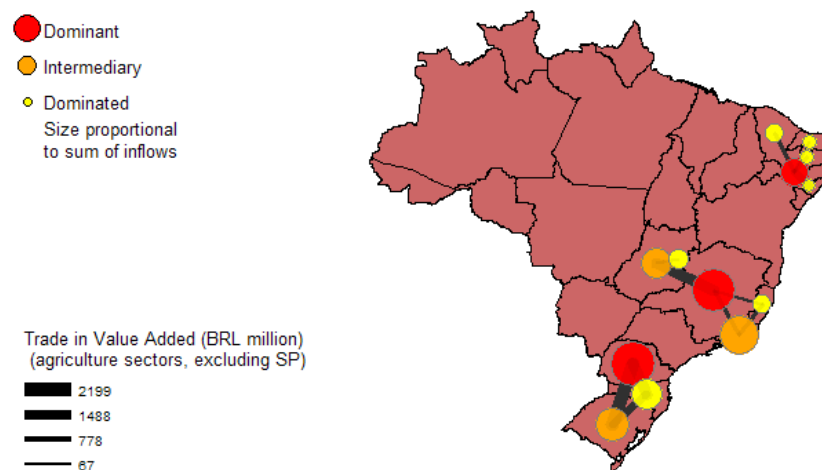

**Figure S2.** Interregional industry-level hierarchical TiVA (agriculture, excluding Sao Paulo)

## MINING

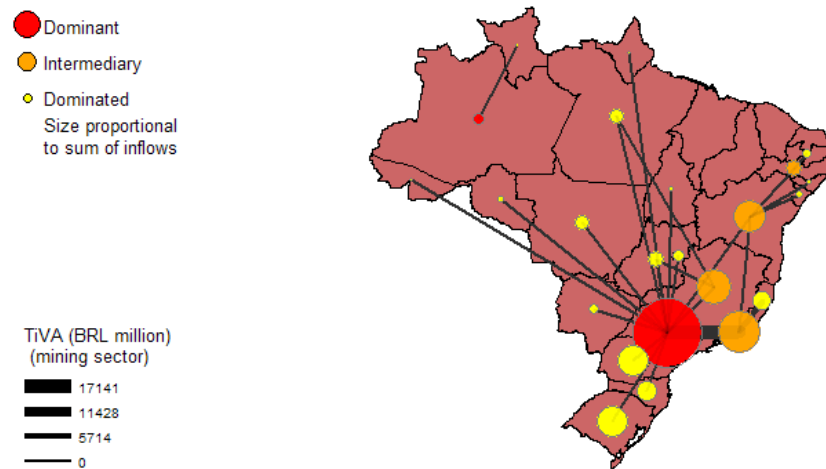

**Figure S3.** Interregional industry-level hierarchical TiVA (mining, all regions)

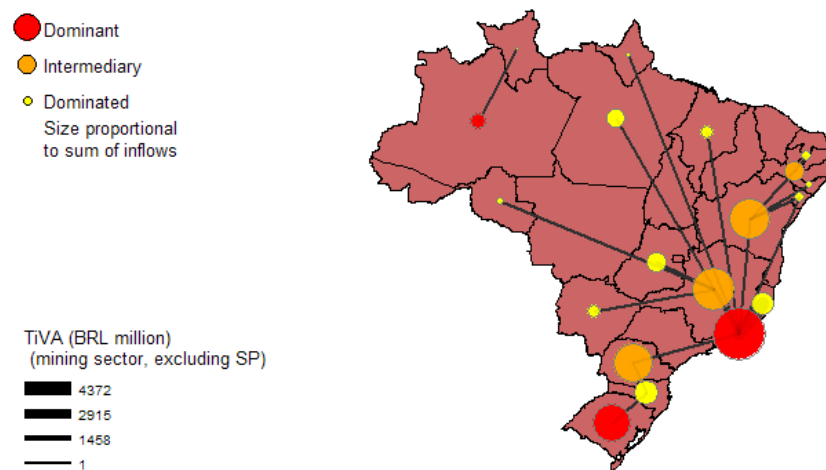

**Figure S4.** Interregional industry-level hierarchical TiVA (mining, excluding Sao Paulo)

## MANUFACTURING

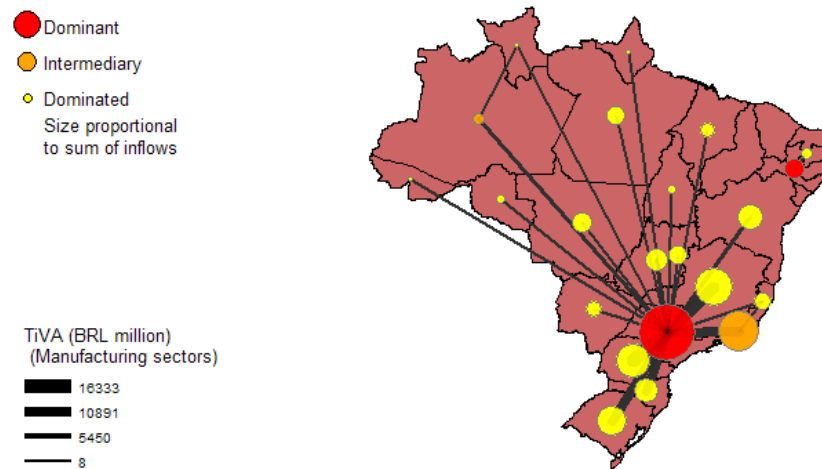

**Figure S5.** Interregional industry-level hierarchical TiVA (manufacturing, all regions).

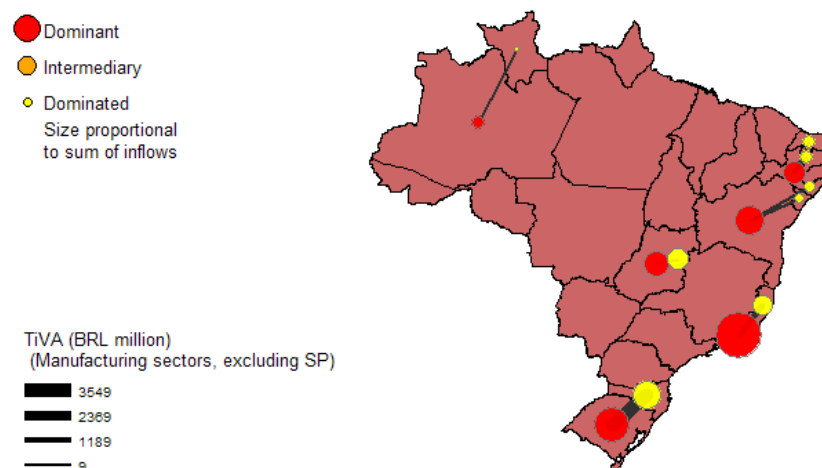

**Figure S6.** Interregional industry-level hierarchical TiVA (manufacturing, excluding Sao Paulo)

## TERTIARY

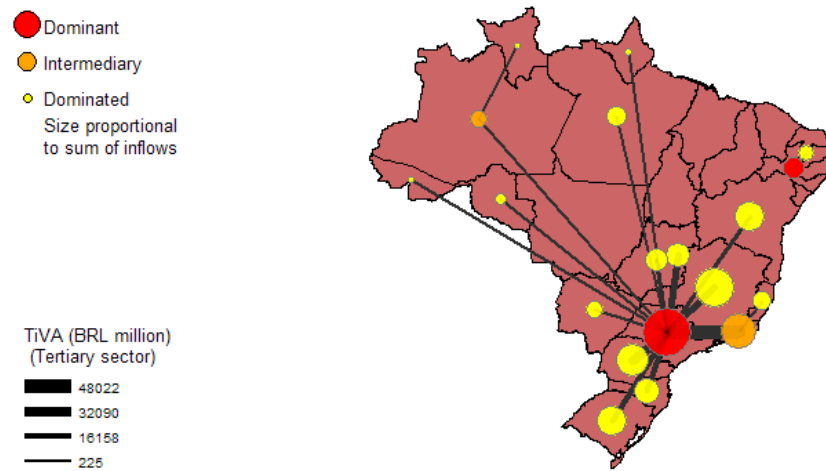

**Figure S7.** Interregional industry-level hierarchical TiVA (tertiary, all regions)

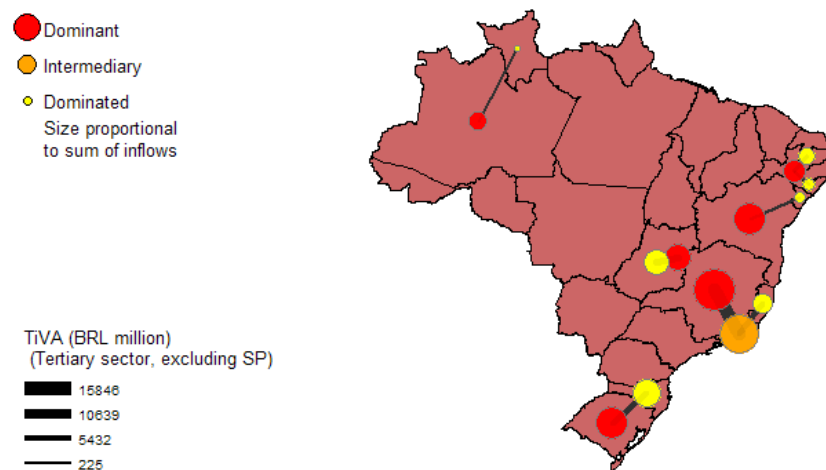

**Figure S8.** Interregional industry-level hierarchical TiVA (tertiary, excluding Sao Paulo)

**Figure S9.** Connectivity trade levels by Brazilian region

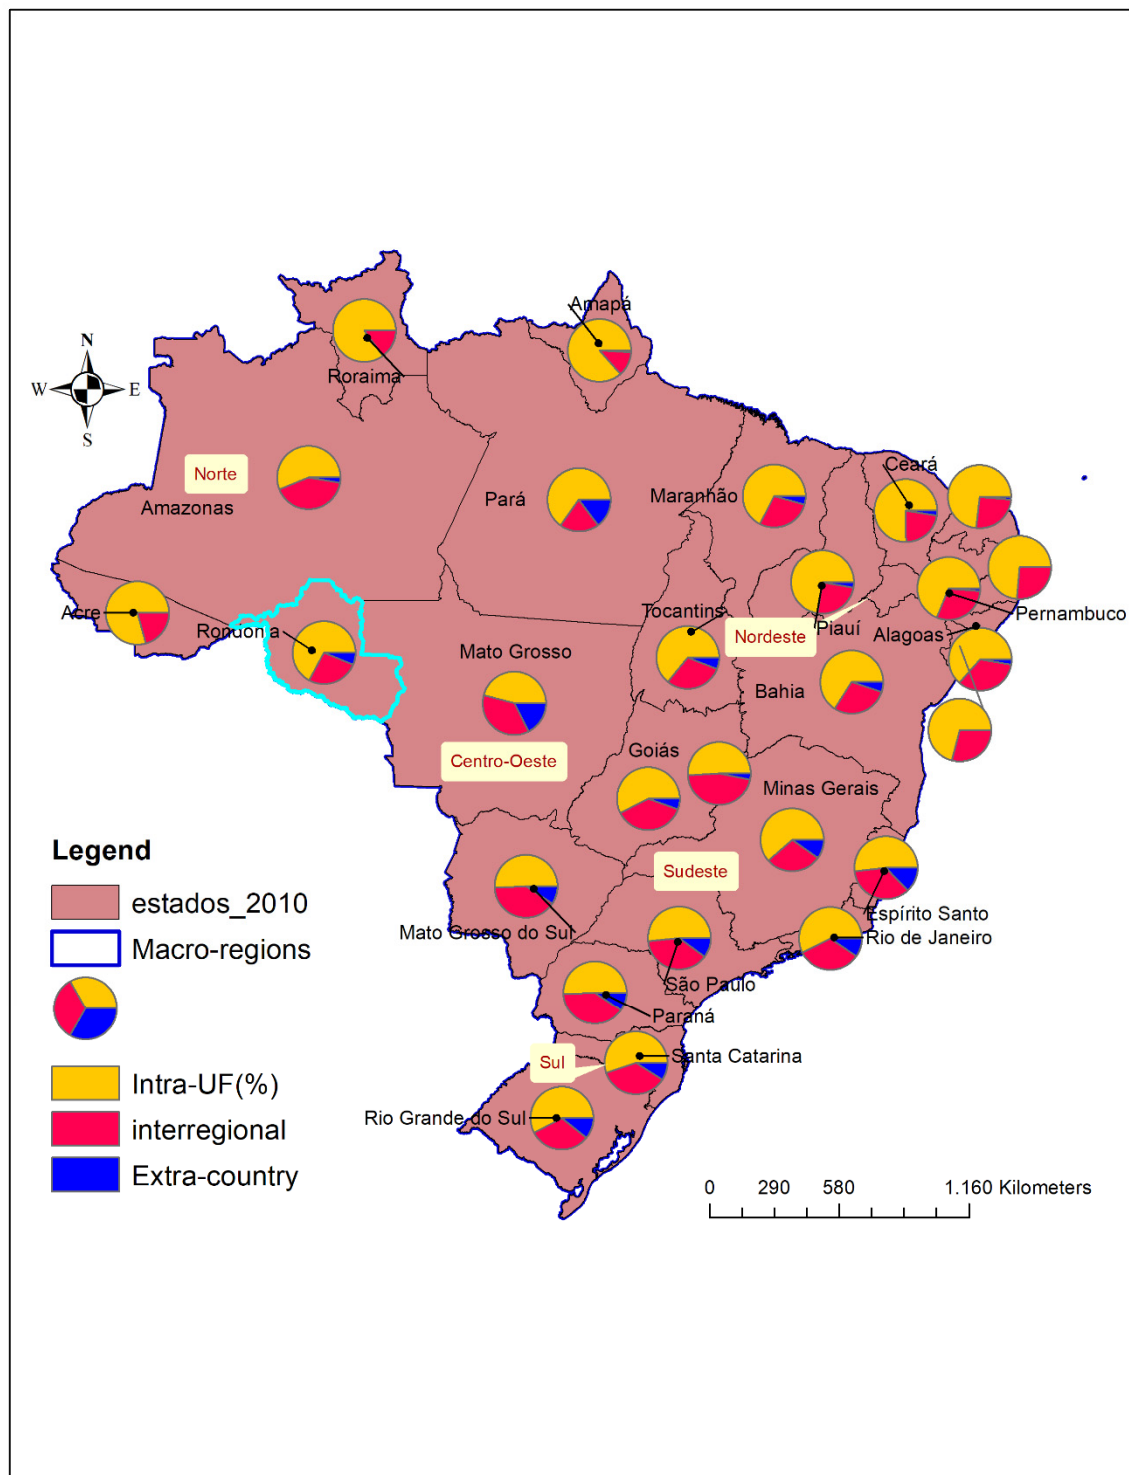

Supplement: s1 [file s1 › economies-2440267-supplementary.pdf]
