# Supplementary material
Source: MDPI journal article supplement (https://www.mdpi.com/2227-7099/11/7/199)
Supplement: s1 [file s1]

Archive with 1 entries (1 files):
- economies-2440267-supplementary.pdf
